# Supplementary material for: Early-life Family Socioeconomic and Educational Impacts on Adult EEG and Behavioral Signatures of Visual Cognitive Function
Source: Research Square preprint supplement (doi:10.21203/rs.3.rs-7239089/v1), 2025-09-23
Supplement: Supplementary file 1 [file cec67fcb8ef168409b304857.docx]

**Supplementary information for
Early-life Family Socioeconomic and Educational Impacts on Adult EEG and Behavioral Signatures of Visual Cognitive Function**

Shuxuan Mao1, Xuan Zhang2,†, Feng-Rui Zhang3,†

1St. Clements School, Toronto, Canada, 21 St Clements Ave, Toronto, M4R 1G8

2 College of Marine Engineering, Jimei University, Xiamen, P. R. China, 361021

3 Department of Neuroscience and Department of Psychiatry, Washington University in St. Louis, St. Louis, MO, USA, 63110

† Correspondence to Dr. Xuan Zhang: zxjmu001@163.com,Dr. Fengrui Zhang: zhang.ray.1026@gmail.com.


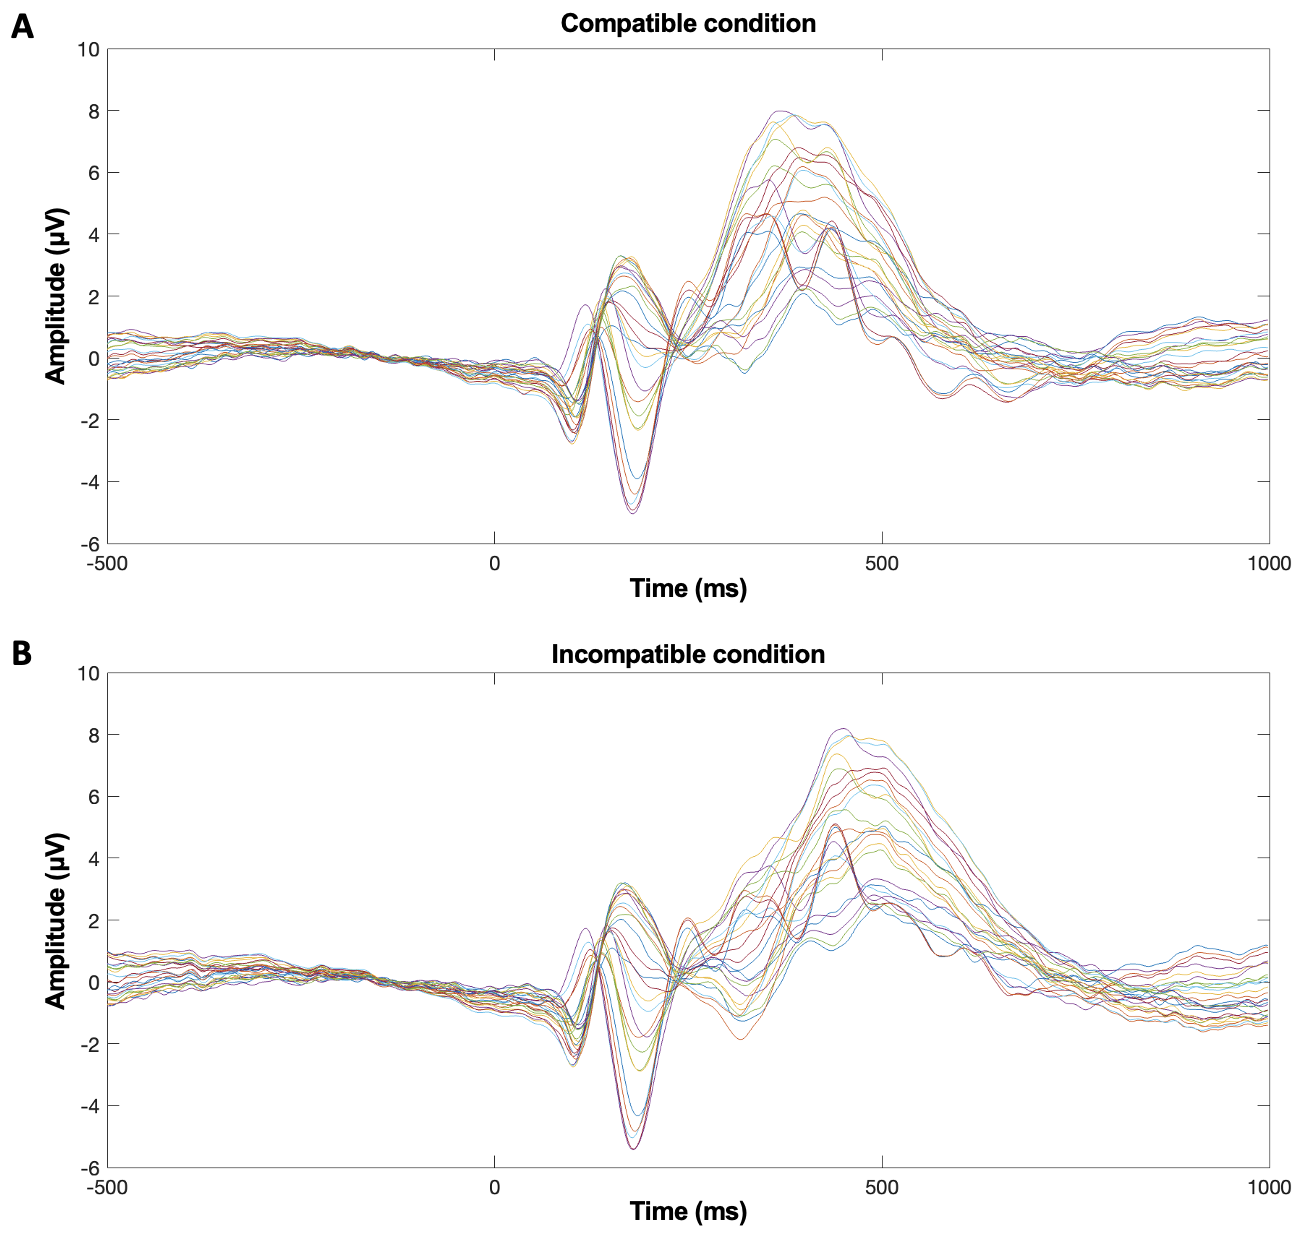


Figure S1. Group-mean time-domain signal of flanker task for compatible (A) and incompatible (B) conditions from all electrodes (related to Figure 2).


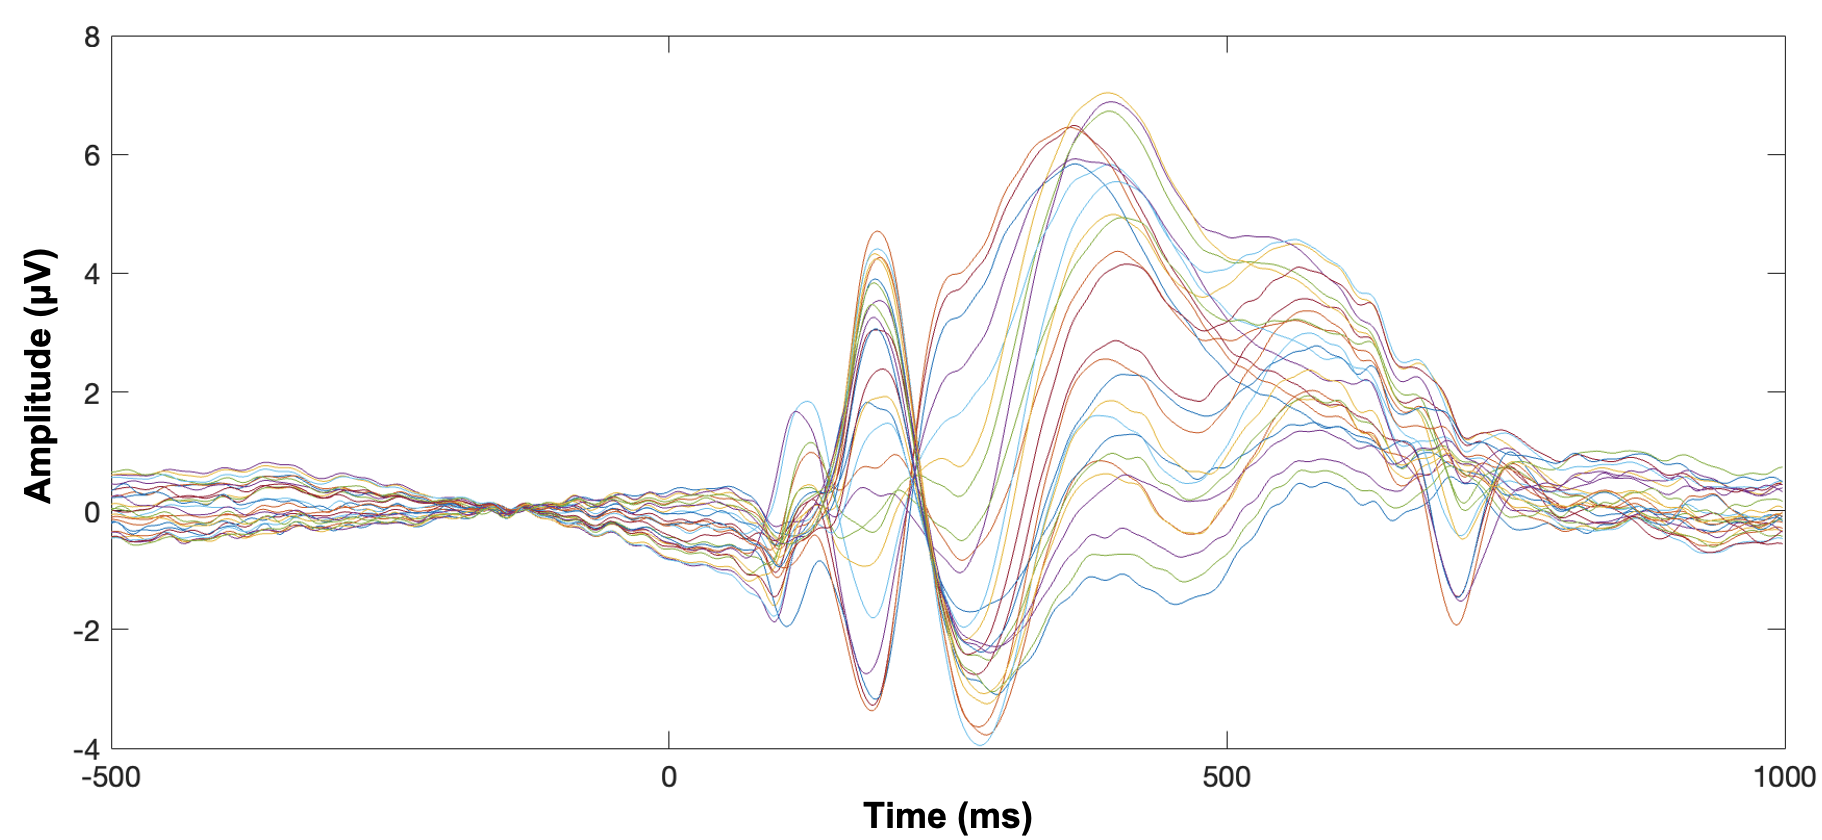


Figure S2. Group-mean time-domain signal of visual search task from all electrodes (related to Figure 4).

Table S1. Correlation matrix between demographic and behavioral data (related to Figure 1).

|  | | Family SES | Household income | Participant’s education level | Parental education level |
| --- | --- | --- | --- | --- | --- |
| FL | Accuracy (ICm) | r = -0.170  p = 0.155 | r = 0.137  p = 0.251 | r = 0.254  p = 0.031 | r = -0.144  p = 0.228 |
| Accuracy (Cm) | r = -0.020  p = 0.870 | r = 0.207  p = 0.081 | r = -0.059  p = 0.621 | r = -0.069  p = 0.567 |
| Reaction time (ICm) | r = -0.181  p = 0.131 | r = -0.236  p = 0.046 | r = -0.049  p = 0.680 | r = -0.197  p = 0.098 |
| Reaction time (Cm) | r = -0.174  p = 0.148 | r = -0.242  p = 0.041 | r = -0.061  p = 0.2611 | r = -0.165  p = 0.166 |
| VS | Accuracy | r = 0.215  p = 0.088 | r = 0.150  p = 0.232 | r = 0.181  p = 0.148 | r = 0.154  p = 0.220 |
| Reaction time | r = -0.172  p = 0.175 | r = -0.246  p = 0.038 | r = 0.050  p = 0.690 | r = -0.312  p = 0.012 |

Table S2. Correlation matrix for FL ERP components and demographic data. (related to Figure 3).

|  | | Family SES | Household income | Participant’s education level | Parental education level |
| --- | --- | --- | --- | --- | --- |
| ICm | P2 | r = -0.245  p = 0.038 | r = -0.057  p = 0.632 | r = -0.076  p = 0.522 | r = -0.139  p = 0.241 |
| N2 | r = -0.136  p = 0.254 | r = -0.242  p = 0.039 | r = -0.269  p = 0.021 | r = 0.077  p = 0.519 |
| P3 | r = 0.009  p = 0.942 | r = -0.073  p = 0.538 | r = 0.115  p = 0.334 | r = -0.105  p = 0.374 |
| Beta | r = -0.130  p = 0.277 | r = 0.092  p = 0.439 | r = 0.085  p = 0.477 | r = -0.010  p = 0.932 |
| Gamma | r = 0.045  p = 0.710 | r = 0.084  p = 0.478 | r = -0.057  p = 0.630 | r = 0.006  p = 0.962 |
| Cm | P2 | r = -0.244  p = 0.039 | r = -0.146  p = 0.217 | r = -0.068  p = 0.566 | r = -0.138  p = 0.243 |
| N2 | r = -0.107  p = 0.372 | r = -0.240  p = 0.040 | r = -0.271  p = 0.021 | r = 0.100  p = 0.402 |
| P3 | r = 0.035  p = 0.773 | r = 0.091  p = 0.444 | r = 0.076  p = 0.525 | r = -0.031  p = 0.793 |
| Beta | r = -0.099  p = 0.410 | r = 0.051  p = 0.667 | r = 0.064  p = 0.592 | r = 0.015  p = 0.898 |
| Gamma | r = 0.062  p = 0.603 | r = -0.023  p = 0.845 | r = -0.076  p = 0.525 | r = 0.034  p = 0.777 |
| Diff (Cm-ICm) | P2 | r = 0.011  p = 0.924 | r = -0.282  p = 0.016 | r = 0.028  p = 0.815 | r = 0.007  p = 0.956 |
| N2 | r = 0.097  p = 0.418 | r = 0.016  p = 0.891 | r = 0.007  p = 0.952 | r = 0.069  p = 0.562 |
| P3 | r = 0.043  p = 0.718 | r = 0.263  p = 0.025 | r = -0.053  p = 0.658 | r = 0.111  p = 0.349 |
| Beta | r = 0.092  p = 0.441 | r = -0.126  p = 0.287 | r = -0.061  p = 0.605 | r = 0.083  p = 0.485 |
| Gamma | r = 0.066  p = 0.584 | r = -0.310  p = 0.008 | r = -0.070  p = 0.556 | r = 0.088  p = 0.460 |

Table S3. Correlation matrix for VS ERP components and demographic data.

|  | | Family SES | Household income | Participant’s education level | Parental education level |
| --- | --- | --- | --- | --- | --- |
|  | P1 | r = 0.072  p = 0.553 | r = 0.243  p = 0.040 | r = -0.178  p = 0.134 | r = -0.038  p = 0.750 |
| N1 | r = 0.101  p = 0.400 | r = -0.036  p = 0.765 | r = -0.106  p = 0.374 | r = -0.035  p = 0.768 |
| P2 | r = -0.219  p = 0.066 | r = -0.025  p = 0.834 | r = -0.073  p = 0.543 | r = -0.061  p = 0.609 |
| P3 | r = 0.165  p = 0.168 | r = 0.015  p = 0.899 | r = -0.096  p = 0.423 | r = 0.109  p = 0.361 |
| Alpha | r = 0.035  p = 0.775 | r = 0.034  p = 0.778 | r = 0.036  p = 0.766 | r = 0.264  p = 0.025 |
| Beta | r = -0.033  p = 0.786 | r = 0.055  p = 0.644 | r = 0.000  p = 0.998 | r = 0.314  p = 0.007 |

Table S4 CCA results

| Canonical function | | I | II | III |
| --- | --- | --- | --- | --- |
| Canonical correlation (r) | | 0.513 | 0.407 | 0.158 |
| Wilks’ lambda | | 0.600 | 0.814 | 0.975 |
| Approx. F | | 3.11 | 2.43 | 0.87 |
| df1 | | 12 | 6 | 2 |
| df2 | | 175 | 134 | 68 |
| p value | | 0.0005 | 0.029 | 0.424 |
| Canonical Loadings | Family SES | -0.481 | -0.018 | - |
| Household income | -0.658 | 0.466 | - |
| Participant’s education | -0.407 | -0.230 | - |
| Parental education | -0.388 | -0.748 | - |
